# Supplementary material for: Tailoring buried interface of tin oxide-based n-i-p perovskite solar cells via bidirectional and multifunctional metal ion chelating agent modification
Source: Royal Society of Chemistry journal article supplement (doi:10.1039/d3ta02983b), 2023-01-01
Supplement: d3ta02983b1.pdf [file d3ta02983b1.pdf]

**Tailoring buried interface of tin oxide-based n-i-p perovskite solar cells via bidirectional and multifunctional metal ion chelating agent modification**

Meng Wang<sup>1</sup>, Aoxi He<sup>1</sup>, Lili Wu<sup>1,3,5</sup>, Xia Hao<sup>1,3,5</sup>, Gengpei Xia<sup>3</sup>, Yu Jiang<sup>3</sup>, Rong Su<sup>\*4</sup>, Jingquan Zhang<sup>\*1,3,5</sup>

1 College of Materials Science and Engineering, Sichuan University, Chengdu 610065, People's Republic of China

2 Institute of New Energy and Low-Carbon Technology, Sichuan University, Chengdu 610065, People's Republic of China

3 National Photovoltaic Products Quality Supervision and Inspection Center, Chengdu Product Quality Supervision, Inspection and Research Institute, Chengdu 610100, People's Republic of China

4 Department of Science and Technology Innovation, Tongwei Solar (Chengdu) Co., Ltd., Chengdu 610299, People's Republic of China

5 Engineering Research Center of Alternative Energy Materials & Devices, Ministry of Education, Chengdu, 610065, People's Republic of China

(a)

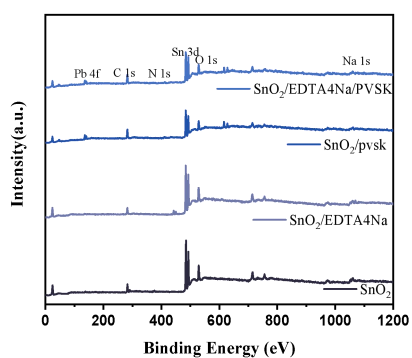

(b)

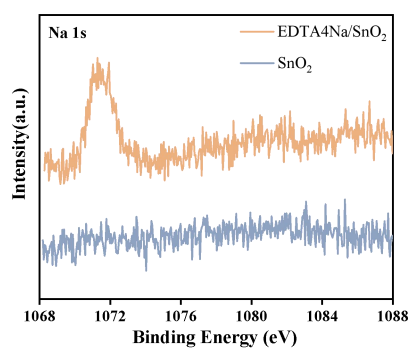

Figure S1 (a) XPS survey spectra of SnO<sub>2</sub>, SnO<sub>2</sub>/EDTA4Na, and SnO<sub>2</sub> coated with particularly low concentration perovskite solution before and after EDTA4Na modification. (b) Na 1s XPS spectra of SnO<sub>2</sub>, SnO<sub>2</sub>/EDTA4Na films.

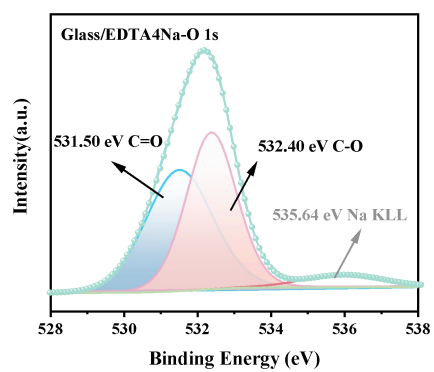

Figure S2 O 1s XPS spectra of EDTA4Na film deposited on glass substrate.

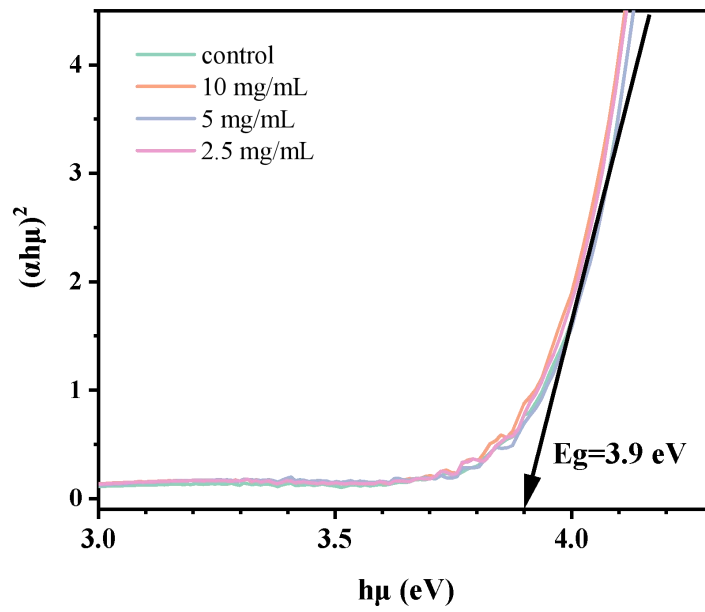

Figure. S3. Optical band gap of SnO<sub>2</sub> before and after EDTA4Na modification, detected by  $(\alpha h\nu)^2$  as a function of photon energy.

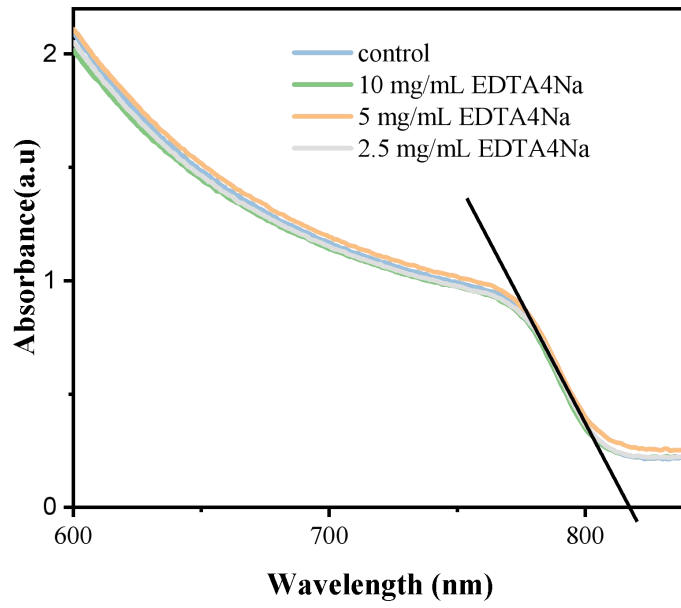

Figure.S4. UV-Vis absorption spectrum of perovskite thin films deposited on SnO<sub>2</sub> and SnO<sub>2</sub>/EDTA4Na.

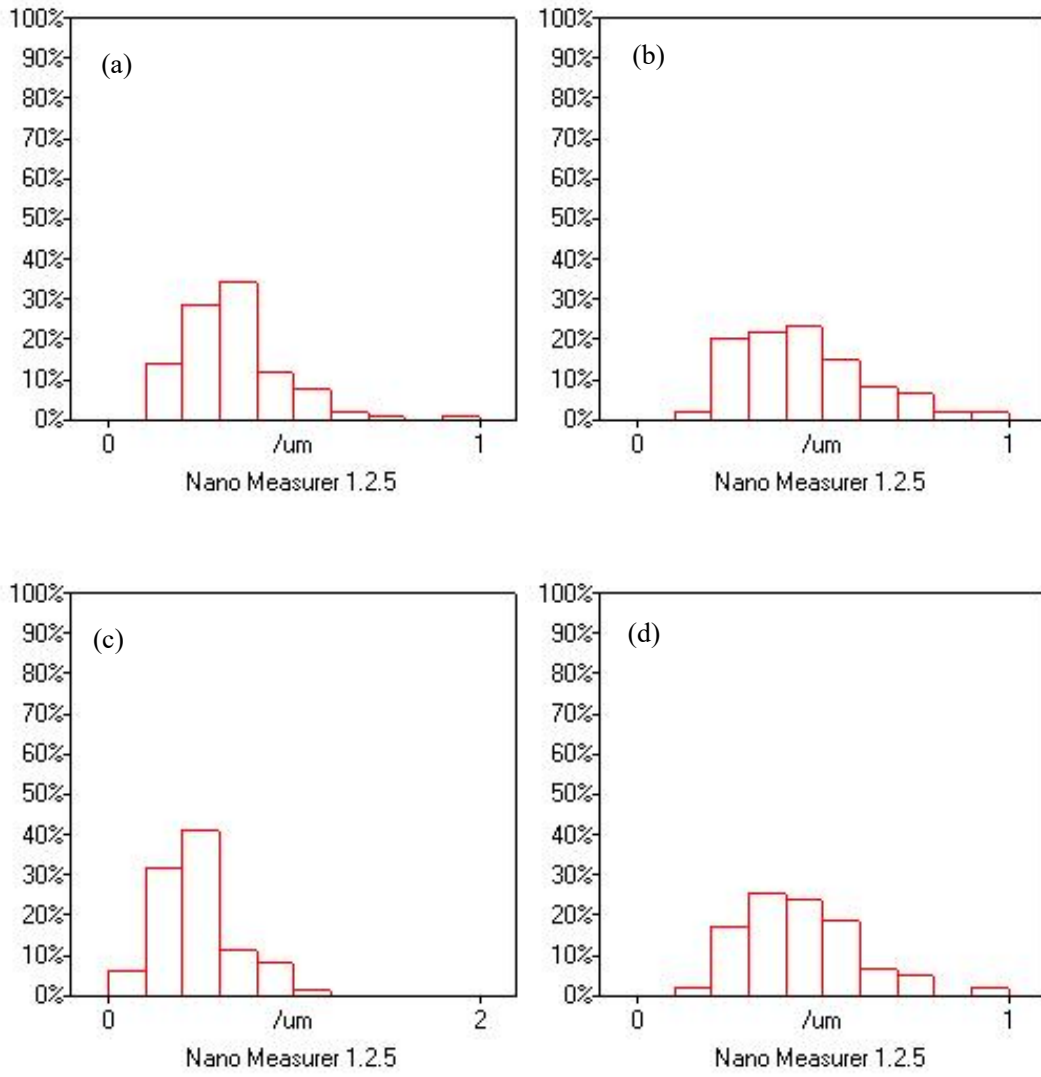

Figure S5 (a)-(d). The grain size distribution of perovskite films deposited on the SnO<sub>2</sub> and SnO<sub>2</sub>/EDTA4Na, corresponding to the FESEM images.

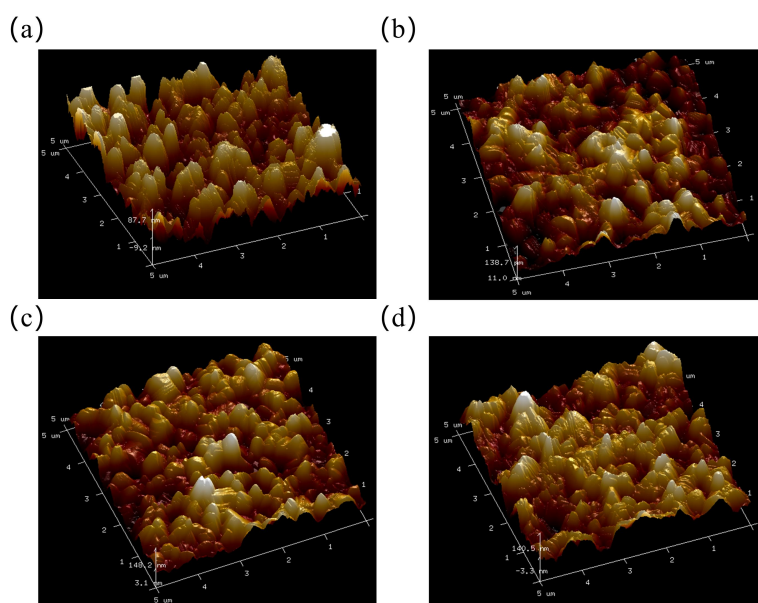

Figure S6 (a)-(d). AFM images of perovskite films deposited on  $\text{SnO}_2$  and  $\text{SnO}_2/\text{EDTA4Na}$ .

**Table S1.** Photovoltaic parameters statistics of devices based on different concentrations of EDTA4Na modification

| Devices   | $V_{oc}$ (V) | $J_{sc}$ (mA cm <sup>-2</sup> ) | FF (%) | PCE (%) |
|-----------|--------------|---------------------------------|--------|---------|
| control   | 1.066        | 24.53                           | 75.04  | 19.64   |
| 10 mg/mL  | 1.102        | 24.93                           | 78.76  | 21.64   |
| 5 mg/mL   | 1.140        | 24.88                           | 80.29  | 22.77   |
| 2.5 mg/mL | 1.069        | 24.45                           | 79.01  | 20.66   |



**Table S2.** Fitting parameters of TRPL decay curves of perovskite films based on ITO/SnO<sub>2</sub> and ITO/SnO<sub>2</sub>/EDTA4Na substrate (refer to Figure. 6b).

| Samples                          | $\tau_1$ (ns) | $A_1$ (%) | $\tau_2$ (ns) | $A_2$  | $\tau_{\text{avg}}$ (ns) |
|----------------------------------|---------------|-----------|---------------|--------|--------------------------|
| ITO/SnO <sub>2</sub> /perovskite | 107.52        | 6.2%      | 543.45        | 93.8%  | 717.31                   |
| ITO/SnO <sub>2</sub> /EDTA4Na    | 27.02         | 18.86%    | 185.36        | 81.14% | 137.81                   |

The trap-state density ( $N_t$ ) can be calculated by the following equation:

$$N_t = \frac{2\varepsilon\varepsilon_0 V_{TFL}}{eL^2}$$

|                                   |                                      |                             |                                                       |
|-----------------------------------|--------------------------------------|-----------------------------|-------------------------------------------------------|
| $L = 5 \times 10^{-5} \text{ cm}$ | $e = 1.60 \times 10^{-19} \text{ C}$ | $\varepsilon = 53.69^{[1]}$ | $\varepsilon_0 = 8.8542 \times 10^{-14} \text{ F/cm}$ |
|-----------------------------------|--------------------------------------|-----------------------------|-------------------------------------------------------|

[1]. Zhen Li, Bo Li, Xin Wu, Stephanie A. Sheppard, Shoufeng Zhang, Danpeng Gao, Nicholas J. Long, and Zonglong Zhu, *Organometallic-functionalized interfaces for highly efficient inverted perovskite solar cells*. 2022. **376**(6591): p. 416-420.
